# Supplementary material for: Very Slow Search and Reach: Failure to Maximize Expected Gain in an Eye-Hand Coordination Task
Source: PLOS journal article supplement (doi:10.1371/journal.pcbi.1002718), 2012-10-11
Supplement: S2 (10.1371/journal.pcbi.1002718.s002) [file journal.pcbi.1002718.s002]

301 Moved Permanently

# Moved Permanently

The document has moved here.

---

Apache Server at www.ploscompbiol.org Port 80
