# Supplementary material for: Very Slow Search and Reach: Failure to Maximize Expected Gain in an Eye-Hand Coordination Task
Source: PLOS journal article supplement (doi:10.1371/journal.pcbi.1002718), 2012-10-11

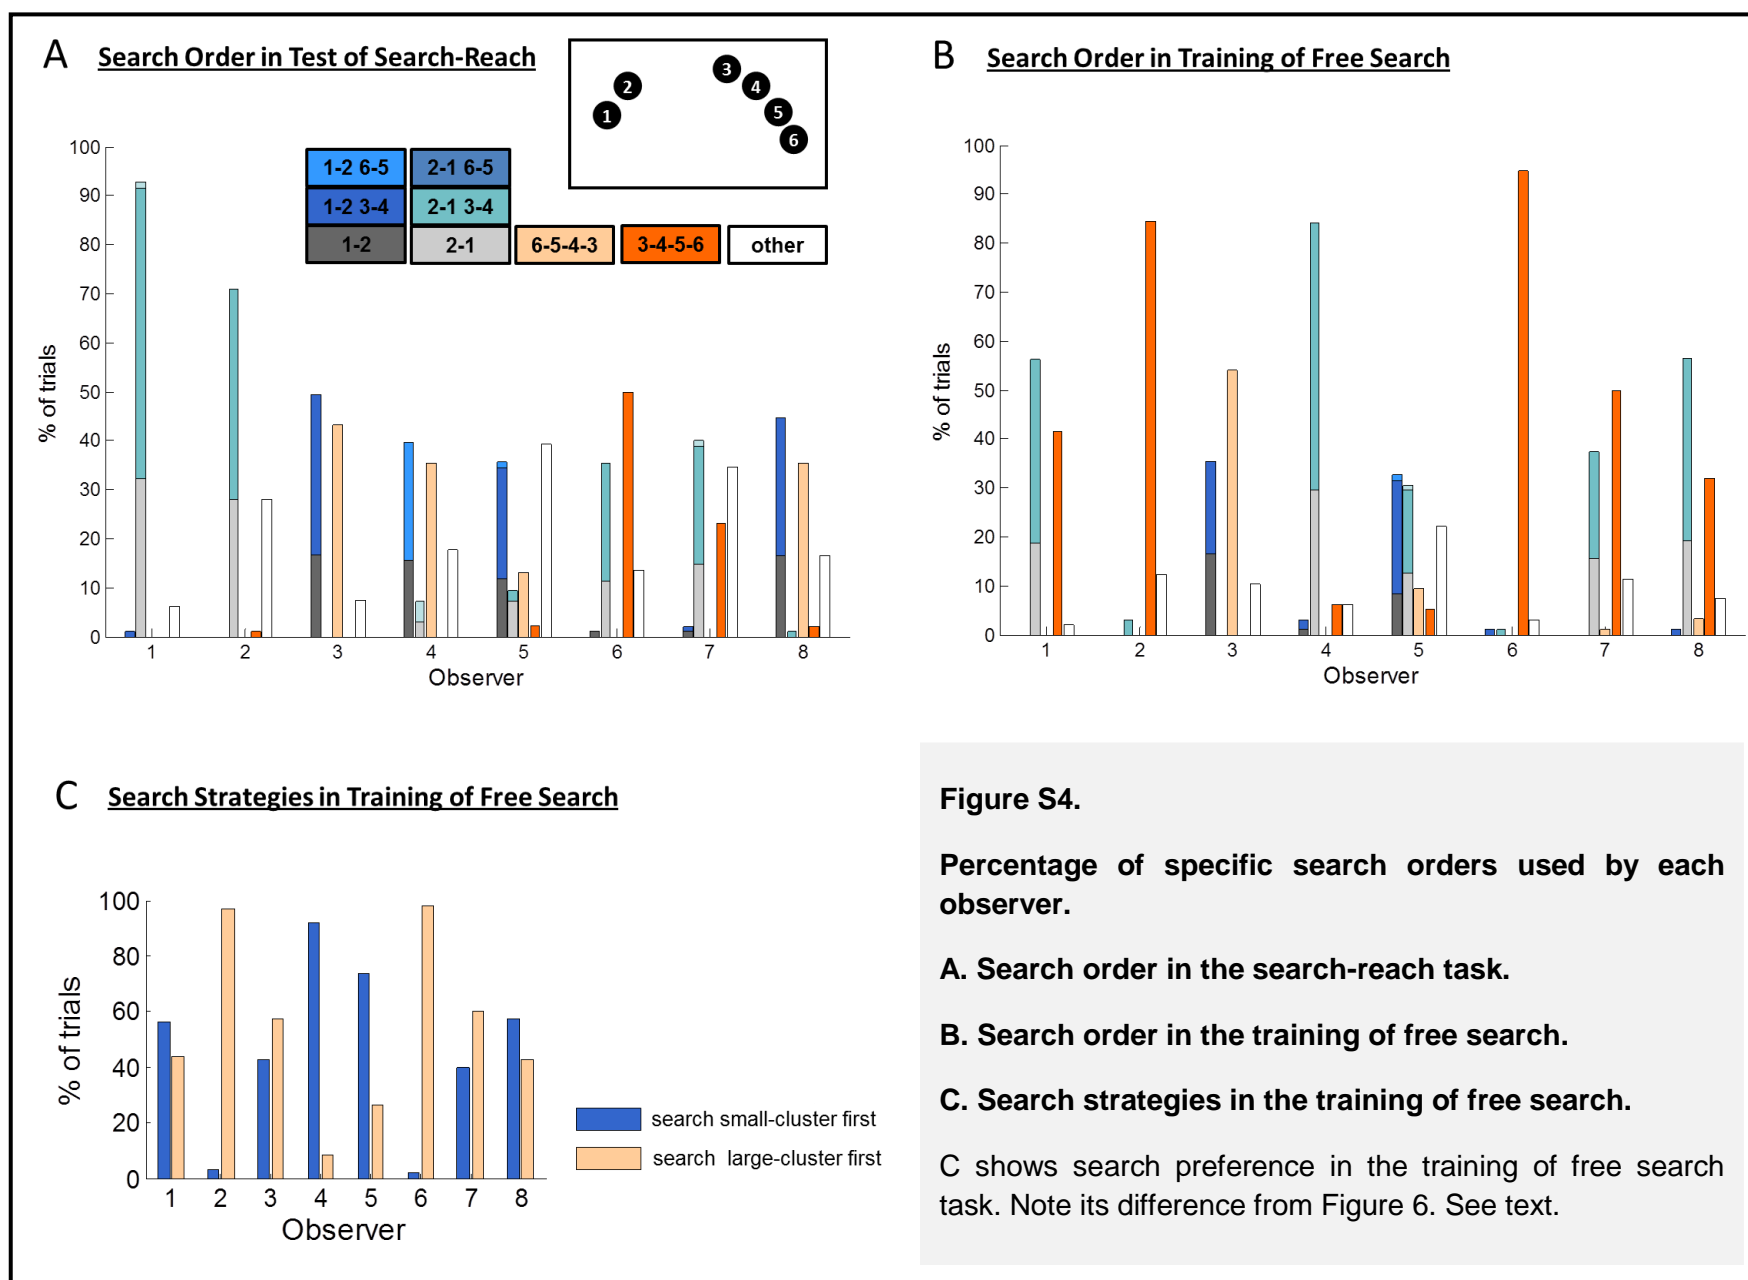

Supplement: S4 (10.1371/journal.pcbi.1002718.s004) [file journal.pcbi.1002718.s004]
