# Supplementary material for: Very Slow Search and Reach: Failure to Maximize Expected Gain in an Eye-Hand Coordination Task
Source: PLOS journal article supplement (doi:10.1371/journal.pcbi.1002718), 2012-10-11

### Could the observer benefit from moving slower before the target was found?

In the search-reach task, before the target was found, observers moved their finger much slower than they did in the training of reach task. Moving slower than their full speed would reduce their expected gain. Some observers stated after the experiment that they believed that they should not move fast when the target had not been found. It is possible that if moving towards a possible wrong direction at full speed would be costly. We tested the possibility that moving slower than the full speed could end up with a larger expected gain, assuming that the observer might randomly deviate from the planned direction of movement.

The results of our simulation were not consistent with this possibility. As Figure S5 shows, all the observers' maximum expected gain increased monotonically with the movement speed, regardless of their motor error and search order.

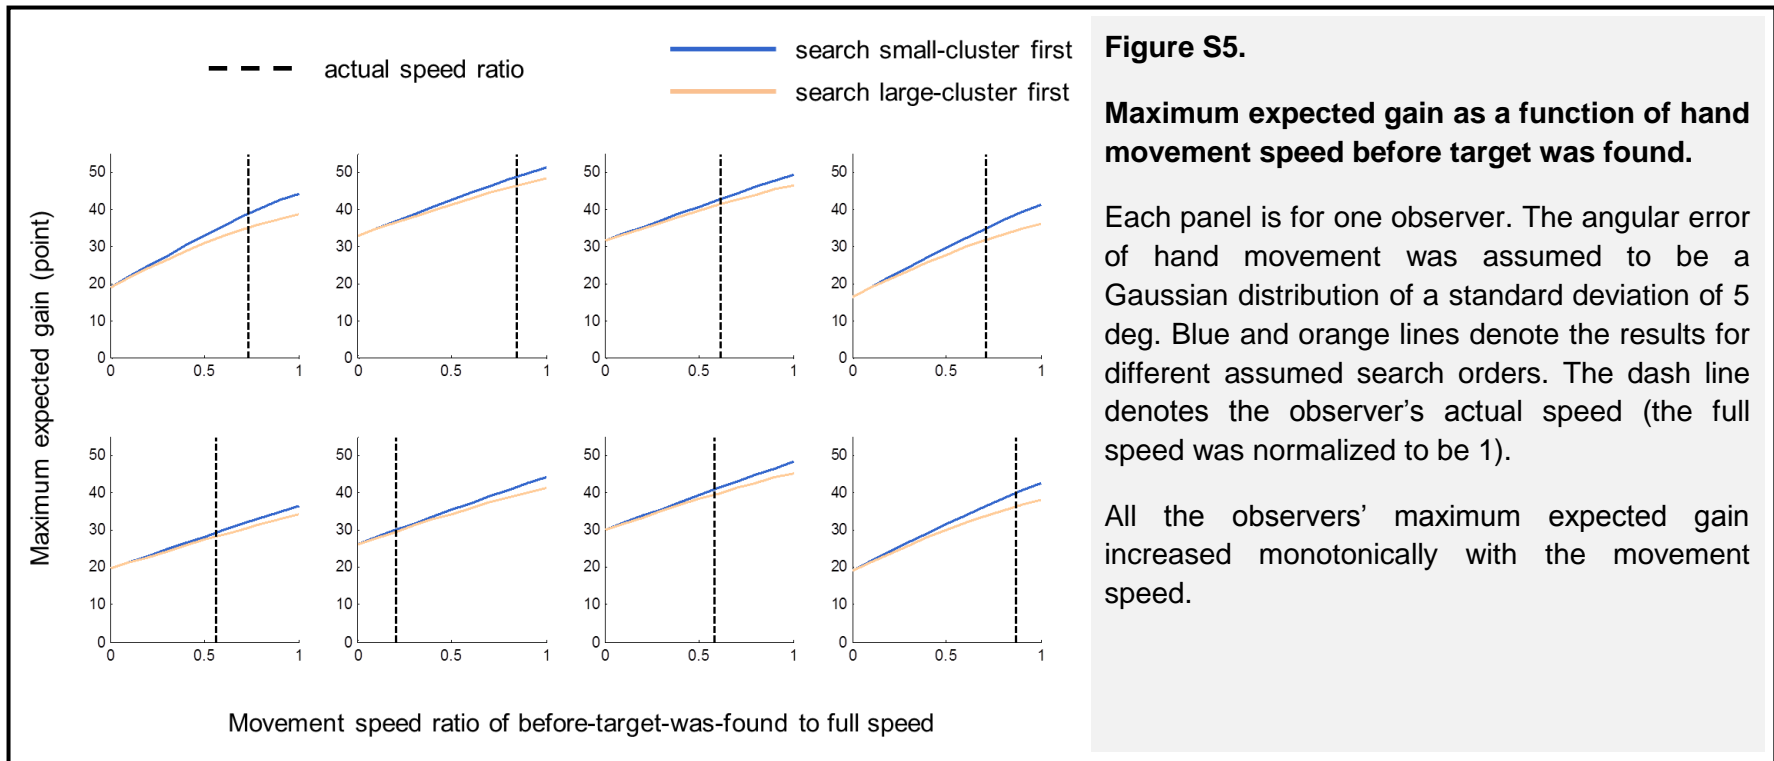

Supplement: S5 (10.1371/journal.pcbi.1002718.s005) [file journal.pcbi.1002718.s005]
